# Supplementary material for: Mid-to-late Holocene Temperature Evolution and Atmospheric Dynamics over Europe in Regional Model Simulations
Source: Copernicus journal article supplement (doi:10.5194/cp-2016-10), 2016-02-02
Supplement: Supplementary file 1 [file cp-2016-10-supplement.pdf]

*Correlation maps MSLP Time Expansion (PCs) and PREC*

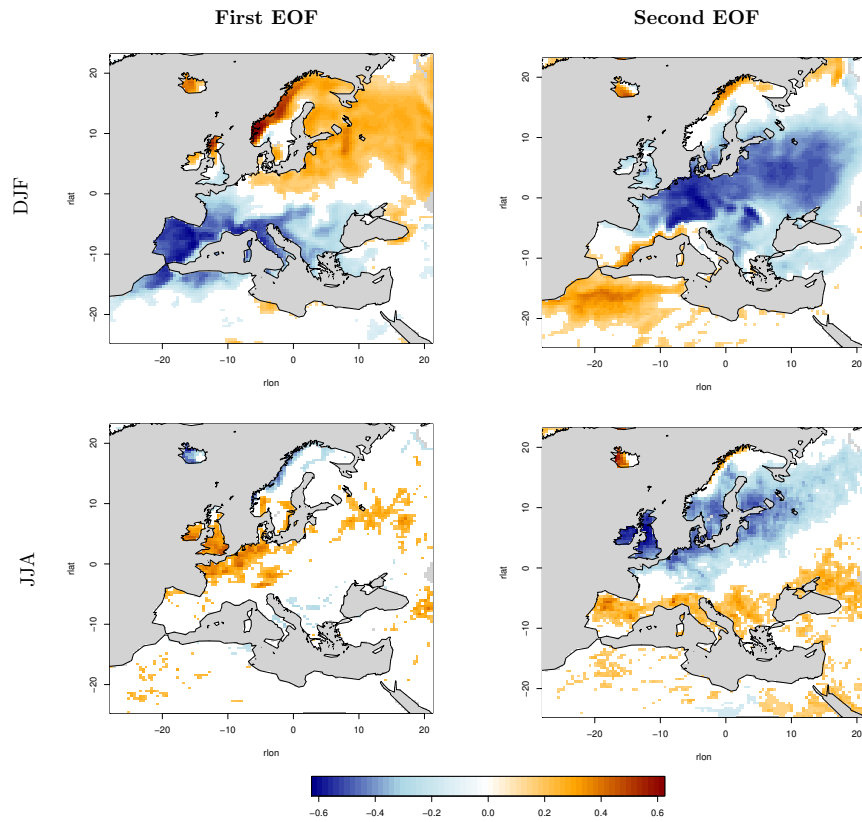

Figure S1: Kendall correlation maps between time evolution of **summer** (lower row) and **winter** (upper row) total precipitation and the time expansion of the principal components of the respective first two EOFs of the MSLP anomalies. The area where the correlation is not significant at a level of 0.05 is masked in white.

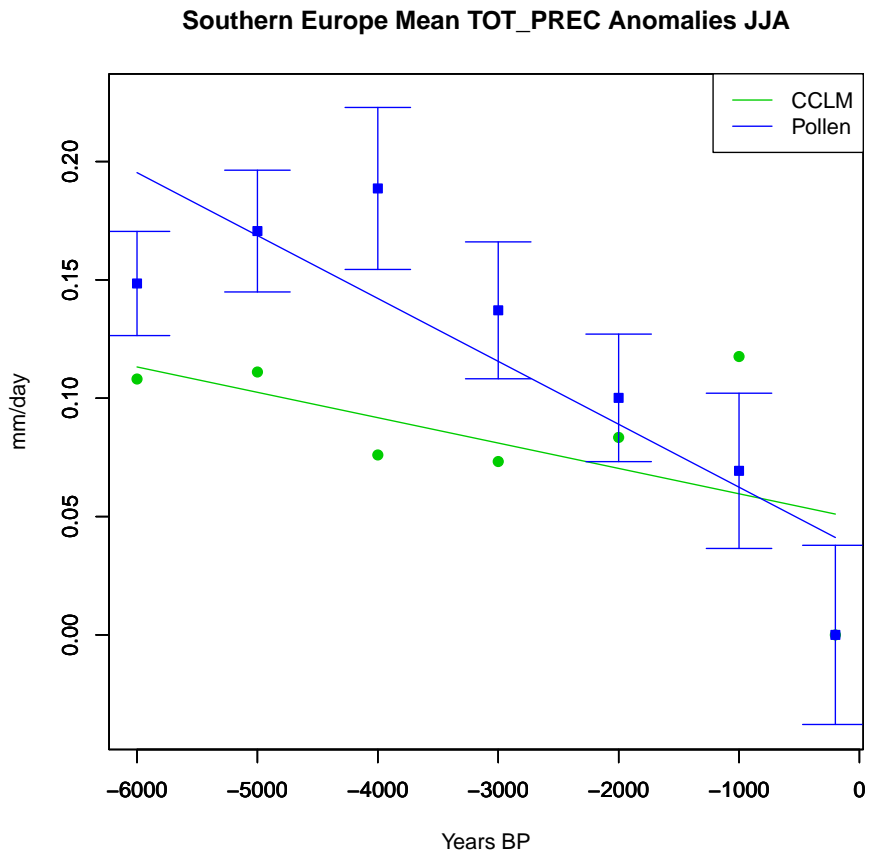

Figure S2: *Mid-to-late Holocene seasonal trends of the regional mean of Summer Precipitation for **blue**Pollen and **green**CCLM results, calculated over Southern Europe, for the area in between 10W:40E and 35N:50N. The bars represent the regional standard error associated to the pollen results.*
